# Supplementary material for: Macrophage polarization and acceleration of atherosclerotic plaques in a swine model
Source: PubMed Central journal article supplement (PMC5862407; doi:10.1371/journal.pone.0193005), 2018-03-21
Supplement: pone.0193005.s006.pdf [file pone.0193005.s006.pdf]

**S1 Table. Coronary or femoral histology analysis raw data.**

| <b>Group</b>                   | <b>Media, mm<sup>2</sup></b> | <b>Intima, mm<sup>2</sup></b> | <b>Plaque, mm<sup>2</sup></b> | <b>I/P, %</b> |
|--------------------------------|------------------------------|-------------------------------|-------------------------------|---------------|
| <b>Saline</b>                  | 1.16                         | 0.51                          | 1.68                          | 30.60         |
| <b>Saline</b>                  | 0.78                         | 0.27                          | 1.05                          | 25.92         |
| <b>Saline</b>                  | 1.34                         | 0.43                          | 1.77                          | 24.38         |
| <b>Saline</b>                  | 1.48                         | 0.37                          | 1.86                          | 20.07         |
| <b>Saline</b>                  | 0.56                         | 0.21                          | 0.77                          | 27.21         |
| <b>Saline</b>                  | 0.54                         | 0.22                          | 0.76                          | 29.06         |
| <b>Saline</b>                  | 1.06                         | 0.33                          | 1.39                          | 23.44         |
| <b>Saline</b>                  | 1.01                         | 0.33                          | 1.34                          | 24.41         |
| <b>Saline</b>                  | 2.00                         | 0.39                          | 2.40                          | 16.32         |
| <b>Saline</b>                  | 1.40                         | 0.25                          | 1.65                          | 15.12         |
| <b>Saline</b>                  | 1.06                         | 0.23                          | 1.29                          | 17.70         |
| <b>HMGB1</b>                   | 0.51                         | 0.39                          | 0.91                          | 43.23         |
| <b>HMGB1</b>                   | 1.12                         | 0.56                          | 1.68                          | 33.18         |
| <b>HMGB1</b>                   | 1.33                         | 0.94                          | 2.27                          | 41.21         |
| <b>HMGB1</b>                   | 1.35                         | 0.73                          | 2.08                          | 34.94         |
| <b>HMGB1</b>                   | 0.81                         | 0.78                          | 1.59                          | 49.02         |
| <b>HMGB1</b>                   | 3.53                         | 1.62                          | 5.15                          | 31.44         |
| <b>HMGB1</b>                   | 0.77                         | 0.63                          | 1.40                          | 44.91         |
| <b>HMGB1</b>                   | 0.87                         | 0.79                          | 1.67                          | 47.61         |
| <b>HMGB1</b>                   | 0.65                         | 0.37                          | 1.01                          | 36.18         |
| <b>HMGB1</b>                   | 0.65                         | 0.50                          | 1.15                          | 43.07         |
| <b>HMGB1</b>                   | 0.54                         | 0.33                          | 0.87                          | 38.30         |
| <b>TNF-<math>\alpha</math></b> | 0.61                         | 0.58                          | 1.19                          | 48.55         |
| <b>TNF-<math>\alpha</math></b> | 0.86                         | 0.81                          | 1.68                          | 48.43         |
| <b>TNF-<math>\alpha</math></b> | 0.98                         | 1.99                          | 2.97                          | 66.96         |
| <b>TNF-<math>\alpha</math></b> | 0.62                         | 0.66                          | 1.28                          | 51.29         |
| <b>TNF-<math>\alpha</math></b> | 1.13                         | 0.23                          | 1.36                          | 17.04         |
| <b>TNF-<math>\alpha</math></b> | 1.42                         | 1.42                          | 2.83                          | 50.02         |
| <b>TNF-<math>\alpha</math></b> | 2.50                         | 0.77                          | 3.27                          | 23.66         |
| <b>TNF-<math>\alpha</math></b> | 0.82                         | 0.22                          | 1.04                          | 21.54         |
| <b>TNF-<math>\alpha</math></b> | 1.23                         | 0.27                          | 1.50                          | 18.04         |
| <b>TNF-<math>\alpha</math></b> | 1.93                         | 0.97                          | 2.91                          | 33.48         |

I/P, intimal plaque ratio
