# Supplementary material for: Macrophage polarization and acceleration of atherosclerotic plaques in a swine model
Source: PubMed Central journal article supplement (PMC5862407; doi:10.1371/journal.pone.0193005), 2018-03-21
Supplement: pone.0193005.s007.pdf [file pone.0193005.s007.pdf]

**S2 Table. Coronary or femoral quantitative angiography raw data.**

| <b>Group</b>  | <b>RD, mm</b> | <b>MLD, mm</b> | <b>DS, %</b> |
|---------------|---------------|----------------|--------------|
| Saline        | 3.16          | 2.41           | 23.54        |
| Saline        | 2.73          | 2.15           | 21.22        |
| Saline        | 2.34          | 1.83           | 21.88        |
| Saline        | 2.1           | 1.61           | 23.6         |
| Saline        | 3.02          | 2.23           | 26.26        |
| Saline        | 3.52          | 2.84           | 19.36        |
| Saline        | 4.39          | 3.54           | 19.4         |
| Saline        | 3.41          | 2.66           | 21.95        |
| Saline        | 3.55          | 2.89           | 18.48        |
| Saline        | 3.34          | 2.69           | 19.41        |
| Saline        | 4.00          | 3.24           | 18.96        |
| HMGB1         | 2.01          | 1.32           | 33.98        |
| HMGB1         | 2.31          | 1.7            | 26.53        |
| HMGB1         | 2.47          | 1.71           | 30.72        |
| HMGB1         | 2.56          | 1.54           | 40.05        |
| HMGB1         | 5.19          | 3.88           | 25.21        |
| HMGB1         | 2.86          | 2.07           | 27.52        |
| HMGB1         | 3.64          | 2.57           | 29.57        |
| HMGB1         | 1.79          | 1.21           | 25.16        |
| HMGB1         | 5.89          | 4.46           | 23.87        |
| HMGB1         | 2.35          | 1.51           | 34.51        |
| HMGB1         | 1.99          | 1.19           | 38.54        |
| TNF- $\alpha$ | 2.56          | 3              | 25.51        |
| TNF- $\alpha$ | 2.13          | 1.21           | 43.4         |
| TNF- $\alpha$ | 2.51          | 1.47           | 41.32        |
| TNF- $\alpha$ | 1.79          | 1.03           | 42.6         |
| TNF- $\alpha$ | 3.85          | 2.79           | 27.72        |
| TNF- $\alpha$ | 4.14          | 3.16           | 23.68        |
| TNF- $\alpha$ | 4.76          | 3.21           | 32.57        |
| TNF- $\alpha$ | 3.66          | 2.61           | 28.69        |
| TNF- $\alpha$ | 4.31          | 3.27           | 24.21        |
| TNF- $\alpha$ | 3.57          | 2.59           | 27.42        |

RD, reference diameter; MLD, minimal luminal diameter; DS, diameter stenosis
